# Supplementary material for: Modeling potential risk areas of Orthohantavirus transmission in Northwestern Argentina using an ecological niche approach
Source: BMC Public Health. 2023 Jun 26;23:1236. doi: 10.1186/s12889-023-16071-2 (PMC10294401; doi:10.1186/s12889-023-16071-2)
Supplement: Supplementary file 2 — Additional file 2: Excel A1. Rodents occurrence records. [file 12889_2023_16071_MOESM2_ESM.xlsx]

## Sheet: Excel Table S1
Additional file 2. Rodents ocurrence records
Individual record	Specie	Longitude	Latitude	Author	Tittle	Publiaction year	Journal	Date	Type traps
1	Oligoryzomys chacoensis	-65.3167	-24.2181	González-Ittig et al.	Phylogenetic relationships among species of the genus Oligoryzomys (Rodentia, Cricetidae) from Central and South America	2010	Zoologica Scripta	NA	Live catch traps
2	Oligoryzomys chacoensis	-64.6033	-23.6447	Jayat et al.	Mamíferos del Pedemonte de Yungas de la Alta Cuenca del Río Bermejo en Argentina una Línea de Base de Diversidad	2010	Mastozoología Neotropical	May 2003 to March 2008	Sherman
3	Oligoryzomys chacoensis	-64.5814	-23.6628	Jayat et al.	Mamíferos del Pedemonte de Yungas de la Alta Cuenca del Río Bermejo en Argentina una Línea de Base de Diversidad	2010	Mastozoología Neotropical	May 2003 to March 2008	Sherman
4	Oligoryzomys chacoensis	-64.5722	-24.1753	Jayat et al.	Mamíferos del Pedemonte de Yungas de la Alta Cuenca del Río Bermejo en Argentina una Línea de Base de Diversidad	2010	Mastozoología Neotropical	May 2003 to March 2008	Sherman
5	Oligoryzomys chacoensis	-64.5594	-24.1856	Jayat et al.	Mamíferos del Pedemonte de Yungas de la Alta Cuenca del Río Bermejo en Argentina una Línea de Base de Diversidad	2010	Mastozoología Neotropical	May 2003 to March 2008	Sherman
6	Oligoryzomys chacoensis	-64.5431	-23.2272	Jayat et al.	Mamíferos del Pedemonte de Yungas de la Alta Cuenca del Río Bermejo en Argentina una Línea de Base de Diversidad	2010	Mastozoología Neotropical	May 2003 to March 2008	Sherman
7	Oligoryzomys chacoensis	-64.5342	-23.6619	Jayat et al.	Mamíferos del Pedemonte de Yungas de la Alta Cuenca del Río Bermejo en Argentina una Línea de Base de Diversidad	2010	Mastozoología Neotropical	May 2003 to March 2008	Sherman
8	Oligoryzomys chacoensis	-64.5267	-23.8275	Jayat et al.	Mamíferos del Pedemonte de Yungas de la Alta Cuenca del Río Bermejo en Argentina una Línea de Base de Diversidad	2010	Mastozoología Neotropical	May 2003 to March 2008	Sherman
9	Oligoryzomys chacoensis	-64.4081	-23.0575	Gonzalez Della Valle et al.	Andes virus associated with hantavirus pulmonary syndrome in northern Argentina and determination of the precise site of infection	2002	American Journal of Tropical Medicne and Hygiene	December 1997	Sherman and Tomahawk
10	Oligoryzomys chacoensis	-64.3167	-23.1333	Gonzales-Ittig et al.	Phylogenetic relationships among species of the genus Oligoryzomys (Rodentia, Cricetidae) from Central and South America	2010	Zoologica Scripta	NA	Live catch traps
11	Oligoryzomys chacoensis	-64.2778	-23.1181	Jayat et al.	Mamíferos del Pedemonte de Yungas de la Alta Cuenca del Río Bermejo en Argentina una Línea de Base de Diversidad	2010	Mastozoología Neotropical	May 2003 to March 2008	Sherman
12	Oligoryzomys chacoensis	-64.2689	-23.0864	Jayat et al.	Mamíferos del Pedemonte de Yungas de la Alta Cuenca del Río Bermejo en Argentina una Línea de Base de Diversidad	2010	Mastozoología Neotropical	May 2003 to March 2008	Sherman
13	Oligoryzomys chacoensis	-64.2508	-23.1142	Jayat et al.	Mamíferos del Pedemonte de Yungas de la Alta Cuenca del Río Bermejo en Argentina una Línea de Base de Diversidad	2010	Mastozoología Neotropical	May 2003 to March 2008	Sherman
14	Oligoryzomys chacoensis	-64.1353	-22.8931	Jayat et al.	Mamíferos del Pedemonte de Yungas de la Alta Cuenca del Río Bermejo en Argentina una Línea de Base de Diversidad	2010	Mastozoología Neotropical	May 2003 to March 2008	Sherman
15	Oligoryzomys chacoensis	-64.0794	-22.8517	Jayat et al.	Mamíferos del Pedemonte de Yungas de la Alta Cuenca del Río Bermejo en Argentina una Línea de Base de Diversidad	2010	Mastozoología Neotropical	May 2003 to March 2008	Sherman
16	Oligoryzomys chacoensis	-63.9686	-22.3114	Jayat et al.	Mamíferos del Pedemonte de Yungas de la Alta Cuenca del Río Bermejo en Argentina una Línea de Base de Diversidad	2010	Mastozoología Neotropical	May 2003 to March 2008	Sherman
17	Oligoryzomys chacoensis	-63.9267	-22.0286	Jayat et al.	Mamíferos del Pedemonte de Yungas de la Alta Cuenca del Río Bermejo en Argentina una Línea de Base de Diversidad	2010	Mastozoología Neotropical	May 2003 to March 2008	Sherman
18	Oligoryzomys chacoensis	-59.7167	-25.2167	González-Ittig et al.	Phylogenetic relationships among species of the genus Oligoryzomys (Rodentia, Cricetidae) from Central and South America	2010	Zoologica Scripta	NA	Live catch traps
19	Oligoryzomys chacoensis	-59.1178	-26.2358	Notarnicola	Description of Adult and Fourth-Stage Larva of Litomosoides navonae n. sp. (Nematoda: Onchocercidae), a Parasite of Five Species of Sigmodontine Rodents from Northeastern Argentina	2005	Systematic Parasitology	July 2001	Live catch traps
20	Oligoryzomys chacoensis	-65.3762	-24.4147	RGBIF	Oligoryzomys chacoensis (Myers & Carleton, 1981) in GBIF Secretariat (2021). GBIF Backbone Taxonomy. Checklist dataset https://doi.org/10.15468/39omei accessed via GBIF.org. Accessed from R via rgbif (https://github.com/ropensci/rgbif) on 20-04-29.			1998	NA
21	Oligoryzomys chacoensis	-65.1167	-24.0333	RGBIF	Oligoryzomys chacoensis (Myers & Carleton, 1981) in GBIF Secretariat (2021). GBIF Backbone Taxonomy. Checklist dataset https://doi.org/10.15468/39omei accessed via GBIF.org. Accessed from R via rgbif (https://github.com/ropensci/rgbif) on 20-04-29.			1998	NA
22	Oligoryzomys chacoensis	-64.9658	-24.314	RGBIF	Oligoryzomys chacoensis (Myers & Carleton, 1981) in GBIF Secretariat (2021). GBIF Backbone Taxonomy. Checklist dataset https://doi.org/10.15468/39omei accessed via GBIF.org. Accessed from R via rgbif (https://github.com/ropensci/rgbif) on 20-04-29.			NA	NA
23	Oligoryzomys chacoensis	-64.7903	-23.8259	RGBIF	Oligoryzomys chacoensis (Myers & Carleton, 1981) in GBIF Secretariat (2021). GBIF Backbone Taxonomy. Checklist dataset https://doi.org/10.15468/39omei accessed via GBIF.org. Accessed from R via rgbif (https://github.com/ropensci/rgbif) on 20-04-29.			NA	NA
24	Oligoryzomys chacoensis	-64.7	-21.4667	RGBIF	Oligoryzomys chacoensis (Myers & Carleton, 1981) in GBIF Secretariat (2021). GBIF Backbone Taxonomy. Checklist dataset https://doi.org/10.15468/39omei accessed via GBIF.org. Accessed from R via rgbif (https://github.com/ropensci/rgbif) on 20-04-29.			1818	NA
25	Oligoryzomys chacoensis	-64.5833	-23.1	RGBIF	Oligoryzomys chacoensis (Myers & Carleton, 1981) in GBIF Secretariat (2021). GBIF Backbone Taxonomy. Checklist dataset https://doi.org/10.15468/39omei accessed via GBIF.org. Accessed from R via rgbif (https://github.com/ropensci/rgbif) on 20-04-29.			2004	NA
26	Oligoryzomys chacoensis	-64.5697	-23.8186	RGBIF	Oligoryzomys chacoensis (Myers & Carleton, 1981) in GBIF Secretariat (2021). GBIF Backbone Taxonomy. Checklist dataset https://doi.org/10.15468/39omei accessed via GBIF.org. Accessed from R via rgbif (https://github.com/ropensci/rgbif) on 20-04-29.			1984	NA
27	Oligoryzomys chacoensis	-64.5678	-24.0878	RGBIF	Oligoryzomys chacoensis (Myers & Carleton, 1981) in GBIF Secretariat (2021). GBIF Backbone Taxonomy. Checklist dataset https://doi.org/10.15468/39omei accessed via GBIF.org. Accessed from R via rgbif (https://github.com/ropensci/rgbif) on 20-04-29.			1993	NA
28	Oligoryzomys chacoensis	-64.5667	-24.0667	RGBIF	Oligoryzomys chacoensis (Myers & Carleton, 1981) in GBIF Secretariat (2021). GBIF Backbone Taxonomy. Checklist dataset https://doi.org/10.15468/39omei accessed via GBIF.org. Accessed from R via rgbif (https://github.com/ropensci/rgbif) on 20-04-29.			1993	NA
29	Oligoryzomys chacoensis	-64.4227	-23.864	RGBIF	Oligoryzomys chacoensis (Myers & Carleton, 1981) in GBIF Secretariat (2021). GBIF Backbone Taxonomy. Checklist dataset https://doi.org/10.15468/39omei accessed via GBIF.org. Accessed from R via rgbif (https://github.com/ropensci/rgbif) on 20-04-29.			1985	NA
30	Oligoryzomys chacoensis	-64.3222	-23.1358	RGBIF	Oligoryzomys chacoensis (Myers & Carleton, 1981) in GBIF Secretariat (2021). GBIF Backbone Taxonomy. Checklist dataset https://doi.org/10.15468/39omei accessed via GBIF.org. Accessed from R via rgbif (https://github.com/ropensci/rgbif) on 20-04-29.			NA	NA
31	Oligoryzomys chacoensis	-63.917	-21.4371	RGBIF	Oligoryzomys chacoensis (Myers & Carleton, 1981) in GBIF Secretariat (2021). GBIF Backbone Taxonomy. Checklist dataset https://doi.org/10.15468/39omei accessed via GBIF.org. Accessed from R via rgbif (https://github.com/ropensci/rgbif) on 20-04-29.			1995	NA
32	Oligoryzomys chacoensis	-63.8174	-22.3397	RGBIF	Oligoryzomys chacoensis (Myers & Carleton, 1981) in GBIF Secretariat (2021). GBIF Backbone Taxonomy. Checklist dataset https://doi.org/10.15468/39omei accessed via GBIF.org. Accessed from R via rgbif (https://github.com/ropensci/rgbif) on 20-04-29.			1984	NA
33	Oligoryzomys chacoensis	-63.7833	-21.8	RGBIF	Oligoryzomys chacoensis (Myers & Carleton, 1981) in GBIF Secretariat (2021). GBIF Backbone Taxonomy. Checklist dataset https://doi.org/10.15468/39omei accessed via GBIF.org. Accessed from R via rgbif (https://github.com/ropensci/rgbif) on 20-04-29.			1991	NA
34	Oligoryzomys chacoensis	-63.7333	-22.2667	RGBIF	Oligoryzomys chacoensis (Myers & Carleton, 1981) in GBIF Secretariat (2021). GBIF Backbone Taxonomy. Checklist dataset https://doi.org/10.15468/39omei accessed via GBIF.org. Accessed from R via rgbif (https://github.com/ropensci/rgbif) on 20-04-29.			1930	NA
35	Oligoryzomys chacoensis	-63.5167	-19.8	RGBIF	Oligoryzomys chacoensis (Myers & Carleton, 1981) in GBIF Secretariat (2021). GBIF Backbone Taxonomy. Checklist dataset https://doi.org/10.15468/39omei accessed via GBIF.org. Accessed from R via rgbif (https://github.com/ropensci/rgbif) on 20-04-29.			1990	NA
36	Oligoryzomys chacoensis	-63.4667	-21.4833	RGBIF	Oligoryzomys chacoensis (Myers & Carleton, 1981) in GBIF Secretariat (2021). GBIF Backbone Taxonomy. Checklist dataset https://doi.org/10.15468/39omei accessed via GBIF.org. Accessed from R via rgbif (https://github.com/ropensci/rgbif) on 20-04-29.			1991	NA
37	Oligoryzomys chacoensis	-63.4287	-23.4937	RGBIF	Oligoryzomys chacoensis (Myers & Carleton, 1981) in GBIF Secretariat (2021). GBIF Backbone Taxonomy. Checklist dataset https://doi.org/10.15468/39omei accessed via GBIF.org. Accessed from R via rgbif (https://github.com/ropensci/rgbif) on 20-04-29.			1993	NA
38	Oligoryzomys chacoensis	-63.3833	-21.0833	RGBIF	Oligoryzomys chacoensis (Myers & Carleton, 1981) in GBIF Secretariat (2021). GBIF Backbone Taxonomy. Checklist dataset https://doi.org/10.15468/39omei accessed via GBIF.org. Accessed from R via rgbif (https://github.com/ropensci/rgbif) on 20-04-29.			1991	NA
39	Oligoryzomys chacoensis	-63.3833	-21	RGBIF	Oligoryzomys chacoensis (Myers & Carleton, 1981) in GBIF Secretariat (2021). GBIF Backbone Taxonomy. Checklist dataset https://doi.org/10.15468/39omei accessed via GBIF.org. Accessed from R via rgbif (https://github.com/ropensci/rgbif) on 20-04-29.			1991	NA
40	Oligoryzomys chacoensis	-63.2333	-21	RGBIF	Oligoryzomys chacoensis (Myers & Carleton, 1981) in GBIF Secretariat (2021). GBIF Backbone Taxonomy. Checklist dataset https://doi.org/10.15468/39omei accessed via GBIF.org. Accessed from R via rgbif (https://github.com/ropensci/rgbif) on 20-04-29.			1991	NA
41	Oligoryzomys chacoensis	-63.2167	-20.75	RGBIF	Oligoryzomys chacoensis (Myers & Carleton, 1981) in GBIF Secretariat (2021). GBIF Backbone Taxonomy. Checklist dataset https://doi.org/10.15468/39omei accessed via GBIF.org. Accessed from R via rgbif (https://github.com/ropensci/rgbif) on 20-04-29.			1985	NA
42	Oligoryzomys chacoensis	-63.1667	-20.85	RGBIF	Oligoryzomys chacoensis (Myers & Carleton, 1981) in GBIF Secretariat (2021). GBIF Backbone Taxonomy. Checklist dataset https://doi.org/10.15468/39omei accessed via GBIF.org. Accessed from R via rgbif (https://github.com/ropensci/rgbif) on 20-04-29.			1985	NA
43	Oligoryzomys chacoensis	-63.1333	-20.45	RGBIF	Oligoryzomys chacoensis (Myers & Carleton, 1981) in GBIF Secretariat (2021). GBIF Backbone Taxonomy. Checklist dataset https://doi.org/10.15468/39omei accessed via GBIF.org. Accessed from R via rgbif (https://github.com/ropensci/rgbif) on 20-04-29.			1985	NA
44	Oligoryzomys chacoensis	-63.13	-20.45	RGBIF	Oligoryzomys chacoensis (Myers & Carleton, 1981) in GBIF Secretariat (2021). GBIF Backbone Taxonomy. Checklist dataset https://doi.org/10.15468/39omei accessed via GBIF.org. Accessed from R via rgbif (https://github.com/ropensci/rgbif) on 20-04-29.			1985	NA
45	Oligoryzomys chacoensis	-63.0833	-20.75	RGBIF	Oligoryzomys chacoensis (Myers & Carleton, 1981) in GBIF Secretariat (2021). GBIF Backbone Taxonomy. Checklist dataset https://doi.org/10.15468/39omei accessed via GBIF.org. Accessed from R via rgbif (https://github.com/ropensci/rgbif) on 20-04-29.			1985	NA
46	Oligoryzomys chacoensis	-63	-20	RGBIF	Oligoryzomys chacoensis (Myers & Carleton, 1981) in GBIF Secretariat (2021). GBIF Backbone Taxonomy. Checklist dataset https://doi.org/10.15468/39omei accessed via GBIF.org. Accessed from R via rgbif (https://github.com/ropensci/rgbif) on 20-04-29.			1985	NA
47	Oligoryzomys chacoensis	-62.7	-18.28	RGBIF	Oligoryzomys chacoensis (Myers & Carleton, 1981) in GBIF Secretariat (2021). GBIF Backbone Taxonomy. Checklist dataset https://doi.org/10.15468/39omei accessed via GBIF.org. Accessed from R via rgbif (https://github.com/ropensci/rgbif) on 20-04-29.			1984	NA
48	Oligoryzomys chacoensis	-62.5667	-21.6333	RGBIF	Oligoryzomys chacoensis (Myers & Carleton, 1981) in GBIF Secretariat (2021). GBIF Backbone Taxonomy. Checklist dataset https://doi.org/10.15468/39omei accessed via GBIF.org. Accessed from R via rgbif (https://github.com/ropensci/rgbif) on 20-04-29.			1991	NA
49	Oligoryzomys chacoensis	-62.3333	-22.45	RGBIF	Oligoryzomys chacoensis (Myers & Carleton, 1981) in GBIF Secretariat (2021). GBIF Backbone Taxonomy. Checklist dataset https://doi.org/10.15468/39omei accessed via GBIF.org. Accessed from R via rgbif (https://github.com/ropensci/rgbif) on 20-04-29.			1945	NA
50	Oligoryzomys chacoensis	-62.1167	-18.4667	RGBIF	Oligoryzomys chacoensis (Myers & Carleton, 1981) in GBIF Secretariat (2021). GBIF Backbone Taxonomy. Checklist dataset https://doi.org/10.15468/39omei accessed via GBIF.org. Accessed from R via rgbif (https://github.com/ropensci/rgbif) on 20-04-29.			1984	NA
51	Oligoryzomys chacoensis	-62.0667	-18.2833	RGBIF	Oligoryzomys chacoensis (Myers & Carleton, 1981) in GBIF Secretariat (2021). GBIF Backbone Taxonomy. Checklist dataset https://doi.org/10.15468/39omei accessed via GBIF.org. Accessed from R via rgbif (https://github.com/ropensci/rgbif) on 20-04-29.			1984	NA
52	Oligoryzomys chacoensis	-61.8882	-24.1943	RGBIF	Oligoryzomys chacoensis (Myers & Carleton, 1981) in GBIF Secretariat (2021). GBIF Backbone Taxonomy. Checklist dataset https://doi.org/10.15468/39omei accessed via GBIF.org. Accessed from R via rgbif (https://github.com/ropensci/rgbif) on 20-04-29.			1993	NA
53	Oligoryzomys chacoensis	-61.7941	-24.3167	RGBIF	Oligoryzomys chacoensis (Myers & Carleton, 1981) in GBIF Secretariat (2021). GBIF Backbone Taxonomy. Checklist dataset https://doi.org/10.15468/39omei accessed via GBIF.org. Accessed from R via rgbif (https://github.com/ropensci/rgbif) on 20-04-29.			NA	NA
54	Oligoryzomys chacoensis	-61.4855	-24.9331	RGBIF	Oligoryzomys chacoensis (Myers & Carleton, 1981) in GBIF Secretariat (2021). GBIF Backbone Taxonomy. Checklist dataset https://doi.org/10.15468/39omei accessed via GBIF.org. Accessed from R via rgbif (https://github.com/ropensci/rgbif) on 20-04-29.			NA	NA
55	Oligoryzomys chacoensis	-60.6007	-22.0223	RGBIF	Oligoryzomys chacoensis (Myers & Carleton, 1981) in GBIF Secretariat (2021). GBIF Backbone Taxonomy. Checklist dataset https://doi.org/10.15468/39omei accessed via GBIF.org. Accessed from R via rgbif (https://github.com/ropensci/rgbif) on 20-04-29.			1995	NA
56	Oligoryzomys chacoensis	-60.55	-22.4167	RGBIF	Oligoryzomys chacoensis (Myers & Carleton, 1981) in GBIF Secretariat (2021). GBIF Backbone Taxonomy. Checklist dataset https://doi.org/10.15468/39omei accessed via GBIF.org. Accessed from R via rgbif (https://github.com/ropensci/rgbif) on 20-04-29.			1997	NA
57	Oligoryzomys chacoensis	-60.4564	-22.4328	RGBIF	Oligoryzomys chacoensis (Myers & Carleton, 1981) in GBIF Secretariat (2021). GBIF Backbone Taxonomy. Checklist dataset https://doi.org/10.15468/39omei accessed via GBIF.org. Accessed from R via rgbif (https://github.com/ropensci/rgbif) on 20-04-29.			1997	NA
58	Oligoryzomys chacoensis	-60.3925	-22.35	RGBIF	Oligoryzomys chacoensis (Myers & Carleton, 1981) in GBIF Secretariat (2021). GBIF Backbone Taxonomy. Checklist dataset https://doi.org/10.15468/39omei accessed via GBIF.org. Accessed from R via rgbif (https://github.com/ropensci/rgbif) on 20-04-29.			1997	NA
59	Oligoryzomys chacoensis	-60.3731	-22.35	RGBIF	Oligoryzomys chacoensis (Myers & Carleton, 1981) in GBIF Secretariat (2021). GBIF Backbone Taxonomy. Checklist dataset https://doi.org/10.15468/39omei accessed via GBIF.org. Accessed from R via rgbif (https://github.com/ropensci/rgbif) on 20-04-29.			1997	NA
60	Oligoryzomys chacoensis	-60.3167	-17.5167	RGBIF	Oligoryzomys chacoensis (Myers & Carleton, 1981) in GBIF Secretariat (2021). GBIF Backbone Taxonomy. Checklist dataset https://doi.org/10.15468/39omei accessed via GBIF.org. Accessed from R via rgbif (https://github.com/ropensci/rgbif) on 20-04-29.			1984	NA
61	Oligoryzomys chacoensis	-59.9	-22.55	RGBIF	Oligoryzomys chacoensis (Myers & Carleton, 1981) in GBIF Secretariat (2021). GBIF Backbone Taxonomy. Checklist dataset https://doi.org/10.15468/39omei accessed via GBIF.org. Accessed from R via rgbif (https://github.com/ropensci/rgbif) on 20-04-29.			1973	NA
62	Oligoryzomys chacoensis	-59.7725	-22.6783	RGBIF	Oligoryzomys chacoensis (Myers & Carleton, 1981) in GBIF Secretariat (2021). GBIF Backbone Taxonomy. Checklist dataset https://doi.org/10.15468/39omei accessed via GBIF.org. Accessed from R via rgbif (https://github.com/ropensci/rgbif) on 20-04-29.			1996	NA
63	Oligoryzomys chacoensis	-59.764	-19.8554	RGBIF	Oligoryzomys chacoensis (Myers & Carleton, 1981) in GBIF Secretariat (2021). GBIF Backbone Taxonomy. Checklist dataset https://doi.org/10.15468/39omei accessed via GBIF.org. Accessed from R via rgbif (https://github.com/ropensci/rgbif) on 20-04-29.			1980	NA
64	Oligoryzomys chacoensis	-59.7333	-22.5	RGBIF	Oligoryzomys chacoensis (Myers & Carleton, 1981) in GBIF Secretariat (2021). GBIF Backbone Taxonomy. Checklist dataset https://doi.org/10.15468/39omei accessed via GBIF.org. Accessed from R via rgbif (https://github.com/ropensci/rgbif) on 20-04-29.			1997	NA
65	Oligoryzomys chacoensis	-59.663	-26.8215	RGBIF	Oligoryzomys chacoensis (Myers & Carleton, 1981) in GBIF Secretariat (2021). GBIF Backbone Taxonomy. Checklist dataset https://doi.org/10.15468/39omei accessed via GBIF.org. Accessed from R via rgbif (https://github.com/ropensci/rgbif) on 20-04-29.			NA	NA
66	Oligoryzomys chacoensis	-59.6088	-26.808	RGBIF	Oligoryzomys chacoensis (Myers & Carleton, 1981) in GBIF Secretariat (2021). GBIF Backbone Taxonomy. Checklist dataset https://doi.org/10.15468/39omei accessed via GBIF.org. Accessed from R via rgbif (https://github.com/ropensci/rgbif) on 20-04-29.			1982	NA
67	Oligoryzomys chacoensis	-59.1833	-23.2	RGBIF	Oligoryzomys chacoensis (Myers & Carleton, 1981) in GBIF Secretariat (2021). GBIF Backbone Taxonomy. Checklist dataset https://doi.org/10.15468/39omei accessed via GBIF.org. Accessed from R via rgbif (https://github.com/ropensci/rgbif) on 20-04-29.			1972	NA
68	Oligoryzomys chacoensis	-59.1159	-23.3157	RGBIF	Oligoryzomys chacoensis (Myers & Carleton, 1981) in GBIF Secretariat (2021). GBIF Backbone Taxonomy. Checklist dataset https://doi.org/10.15468/39omei accessed via GBIF.org. Accessed from R via rgbif (https://github.com/ropensci/rgbif) on 20-04-29.			1983	NA
69	Oligoryzomys chacoensis	-58.5	-21.1333	RGBIF	Oligoryzomys chacoensis (Myers & Carleton, 1981) in GBIF Secretariat (2021). GBIF Backbone Taxonomy. Checklist dataset https://doi.org/10.15468/39omei accessed via GBIF.org. Accessed from R via rgbif (https://github.com/ropensci/rgbif) on 20-04-29.			1991	NA
70	Oligoryzomys chacoensis	-58.16	-26.18	RGBIF	Oligoryzomys chacoensis (Myers & Carleton, 1981) in GBIF Secretariat (2021). GBIF Backbone Taxonomy. Checklist dataset https://doi.org/10.15468/39omei accessed via GBIF.org. Accessed from R via rgbif (https://github.com/ropensci/rgbif) on 20-04-29.			NA	NA
71	Oligoryzomys chacoensis	-57.9	-24.7	RGBIF	Oligoryzomys chacoensis (Myers & Carleton, 1981) in GBIF Secretariat (2021). GBIF Backbone Taxonomy. Checklist dataset https://doi.org/10.15468/39omei accessed via GBIF.org. Accessed from R via rgbif (https://github.com/ropensci/rgbif) on 20-04-29.			1973	NA
72	Oligoryzomys chacoensis	-57.6333	-19.15	RGBIF	Oligoryzomys chacoensis (Myers & Carleton, 1981) in GBIF Secretariat (2021). GBIF Backbone Taxonomy. Checklist dataset https://doi.org/10.15468/39omei accessed via GBIF.org. Accessed from R via rgbif (https://github.com/ropensci/rgbif) on 20-04-29.			1926	NA
73	Oligoryzomys chacoensis	-57.3979	-25.2667	RGBIF	Oligoryzomys chacoensis (Myers & Carleton, 1981) in GBIF Secretariat (2021). GBIF Backbone Taxonomy. Checklist dataset https://doi.org/10.15468/39omei accessed via GBIF.org. Accessed from R via rgbif (https://github.com/ropensci/rgbif) on 20-04-29.			1972	NA
74	Oligoryzomys chacoensis	-57.386	-23.3617	RGBIF	Oligoryzomys chacoensis (Myers & Carleton, 1981) in GBIF Secretariat (2021). GBIF Backbone Taxonomy. Checklist dataset https://doi.org/10.15468/39omei accessed via GBIF.org. Accessed from R via rgbif (https://github.com/ropensci/rgbif) on 20-04-29.			1992	NA
75	Oligoryzomys chacoensis	-57.0667	-25.259	RGBIF	Oligoryzomys chacoensis (Myers & Carleton, 1981) in GBIF Secretariat (2021). GBIF Backbone Taxonomy. Checklist dataset https://doi.org/10.15468/39omei accessed via GBIF.org. Accessed from R via rgbif (https://github.com/ropensci/rgbif) on 20-04-29.			1972	NA
76	Oligoryzomys chacoensis	-64.917	-23.9668	Miguel Lillo Colection				1995	NA
77	Oligoryzomys chacoensis	-64.8492	-23.7588	Miguel Lillo Colection				1991	NA
78	Oligoryzomys chacoensis	-64.8336	-24.2235	Miguel Lillo Colection				NA	NA
79	Oligoryzomys chacoensis	-64.7423	-23.0943	Miguel Lillo Colection				2008	NA
80	Oligoryzomys chacoensis	-64.665	-23.1089	Miguel Lillo Colection				2004	NA
81	Oligoryzomys chacoensis	-64.6534	-23.0898	Miguel Lillo Colection				2004	NA
82	Oligoryzomys chacoensis	-64.5765	-22.6848	Miguel Lillo Colection				1972	NA
83	Oligoryzomys chacoensis	-64.5551	-23.0017	Miguel Lillo Colection				1999	NA
84	Oligoryzomys chacoensis	-64.55	-24.1022	Miguel Lillo Colection				2006	NA
85	Oligoryzomys chacoensis	-64.5474	-23.6402	Miguel Lillo Colection				1995	NA
86	Oligoryzomys chacoensis	-64.5404	-23.1062	Miguel Lillo Colection				2008	NA
87	Oligoryzomys chacoensis	-64.5275	-22.4407	Miguel Lillo Colection				1992	NA
88	Oligoryzomys chacoensis	-64.521	-22.7439	Miguel Lillo Colection				2010	NA
89	Oligoryzomys chacoensis	-64.4988	-22.8969	Miguel Lillo Colection				1963	NA
90	Oligoryzomys chacoensis	-64.4734	-24.883	Miguel Lillo Colection				2006	NA
91	Oligoryzomys chacoensis	-64.4701	-23.6434	Miguel Lillo Colection				2000	NA
92	Oligoryzomys chacoensis	-64.4446	-23.8562	Miguel Lillo Colection				1995	NA
93	Oligoryzomys chacoensis	-64.4434	-23.6773	Miguel Lillo Colection				1995	NA
94	Oligoryzomys chacoensis	-64.4265	-23.0156	Miguel Lillo Colection				2005	NA
95	Oligoryzomys chacoensis	-64.4032	-24.2015	Miguel Lillo Colection				1977	NA
96	Oligoryzomys chacoensis	-64.3626	-23.5582	Miguel Lillo Colection				NA	NA
97	Oligoryzomys chacoensis	-64.2922	-23.1126	Miguel Lillo Colection				1950	NA
98	Oligoryzomys chacoensis	-64.2493	-23.2529	Miguel Lillo Colection				1990	NA
99	Oligoryzomys chacoensis	-64.0638	-25.1879	Miguel Lillo Colection				1988	NA
100	Oligoryzomys chacoensis	-63.7947	-22.42	Miguel Lillo Colection				2008	NA
101	Oligoryzomys chacoensis	-63.2865	-24.6574	Miguel Lillo Colection				1992	NA
102	Oligoryzomys chacoensis	-62.8217	-22.1454	Miguel Lillo Colection				1974	NA
103	Oligoryzomys chacoensis	-61.5833	-23.4167	Miguel Lillo Colection				1993	NA
104	Oligoryzomys chacoensis	-59.7187	-25.2212	Miguel Lillo Colection				2004	NA
105	Oligoryzomys chacoensis	-59.3722	-26.3089	Miguel Lillo Colection				2007	NA
106	Oligoryzomys chacoensis	-58.2267	-25.2437	Miguel Lillo Colection				2007	NA
107	Oligoryzomys flavescens	-64.7833	-31.3333	González-Ittig et al.	Phylogenetic relationships among species of the genus Oligoryzomys (Rodentia, Cricetidae) from Central and South America	2010	Zoologica Scripta	NA	Live catch traps
108	Oligoryzomys flavescens	-64.5814	-23.6628	Jayat et al.	Mamíferos del Pedemonte de Yungas de la Alta Cuenca del Río Bermejo en Argentina una Línea de Base de Diversidad	2010	Mastozoología Neotropical	May 2003 to March 2008	Sherman
109	Oligoryzomys flavescens	-64.5261	-23.8275	Jayat et al.	Mamíferos del Pedemonte de Yungas de la Alta Cuenca del Río Bermejo en Argentina una Línea de Base de Diversidad	2010	Mastozoología Neotropical	May 2003 to March 2008	Sherman
110	Oligoryzomys flavescens	-64.5161	-23.6242	Jayat et al.	Mamíferos del Pedemonte de Yungas de la Alta Cuenca del Río Bermejo en Argentina una Línea de Base de Diversidad	2010	Mastozoología Neotropical	May 2003 to March 2008	Sherman
111	Oligoryzomys flavescens	-64.3167	-23.1333	González-Ittig et al.	Phylogenetic relationships among species of the genus Oligoryzomys (Rodentia, Cricetidae) from Central and South America	2010	Zoologica Scripta	NA	Live catch traps
112	Oligoryzomys flavescens	-64.0006	-22.5378	Jayat et al.	Mamíferos del Pedemonte de Yungas de la Alta Cuenca del Río Bermejo en Argentina una Línea de Base de Diversidad	2010	Mastozoología Neotropical	May 2003 to March 2008	Sherman
113	Oligoryzomys flavescens	-63.9686	-22.3114	Jayat et al.	Mamíferos del Pedemonte de Yungas de la Alta Cuenca del Río Bermejo en Argentina una Línea de Base de Diversidad	2010	Mastozoología Neotropical	May 2003 to March 2008	Sherman
114	Oligoryzomys flavescens	-63.9267	-22.0286	Jayat et al.	Mamíferos del Pedemonte de Yungas de la Alta Cuenca del Río Bermejo en Argentina una Línea de Base de Diversidad	2010	Mastozoología Neotropical	May 2003 to March 2008	Sherman
115	Oligoryzomys flavescens	-63.9	-31.5	González-Ittig et al.	Phylogenetic relationships among species of the genus Oligoryzomys (Rodentia, Cricetidae) from Central and South America	2010	Zoologica Scripta	NA	Live catch traps
116	Oligoryzomys flavescens	-68.65	-32.817	RGBIF	Oligoryzomys flavescens (Waterhouse, 1837) in GBIF Secretariat (2021). GBIF Backbone Taxonomy. Checklist dataset https://doi.org/10.15468/39omei accessed via GBIF.org. Accessed from R via rgbif (https://github.com/ropensci/rgbif) on 2021-04-29.			NA	NA
117	Oligoryzomys flavescens	-66.7	-16.9333	RGBIF	Oligoryzomys flavescens (Waterhouse, 1837) in GBIF Secretariat (2021). GBIF Backbone Taxonomy. Checklist dataset https://doi.org/10.15468/39omei accessed via GBIF.org. Accessed from R via rgbif (https://github.com/ropensci/rgbif) on 2021-04-29.			1953	NA
118	Oligoryzomys flavescens	-66.35	-17.5667	RGBIF	Oligoryzomys flavescens (Waterhouse, 1837) in GBIF Secretariat (2021). GBIF Backbone Taxonomy. Checklist dataset https://doi.org/10.15468/39omei accessed via GBIF.org. Accessed from R via rgbif (https://github.com/ropensci/rgbif) on 2021-04-29.			1915	NA
119	Oligoryzomys flavescens	-65.9865	-32.937	RGBIF	Oligoryzomys flavescens (Waterhouse, 1837) in GBIF Secretariat (2021). GBIF Backbone Taxonomy. Checklist dataset https://doi.org/10.15468/39omei accessed via GBIF.org. Accessed from R via rgbif (https://github.com/ropensci/rgbif) on 2021-04-29.			1990	NA
120	Oligoryzomys flavescens	-65.9847	-17.0414	RGBIF	Oligoryzomys flavescens (Waterhouse, 1837) in GBIF Secretariat (2021). GBIF Backbone Taxonomy. Checklist dataset https://doi.org/10.15468/39omei accessed via GBIF.org. Accessed from R via rgbif (https://github.com/ropensci/rgbif) on 2021-04-29.			1993	NA
121	Oligoryzomys flavescens	-65.9572	-17.2272	RGBIF	Oligoryzomys flavescens (Waterhouse, 1837) in GBIF Secretariat (2021). GBIF Backbone Taxonomy. Checklist dataset https://doi.org/10.15468/39omei accessed via GBIF.org. Accessed from R via rgbif (https://github.com/ropensci/rgbif) on 2021-04-29.			1993	NA
122	Oligoryzomys flavescens	-65.9428	-27.6629	RGBIF	Oligoryzomys flavescens (Waterhouse, 1837) in GBIF Secretariat (2021). GBIF Backbone Taxonomy. Checklist dataset https://doi.org/10.15468/39omei accessed via GBIF.org. Accessed from R via rgbif (https://github.com/ropensci/rgbif) on 2021-04-29.			1998	NA
123	Oligoryzomys flavescens	-65.8897	-17.2339	RGBIF	Oligoryzomys flavescens (Waterhouse, 1837) in GBIF Secretariat (2021). GBIF Backbone Taxonomy. Checklist dataset https://doi.org/10.15468/39omei accessed via GBIF.org. Accessed from R via rgbif (https://github.com/ropensci/rgbif) on 2021-04-29.			1993	NA
124	Oligoryzomys flavescens	-65.8833	-27	RGBIF	Oligoryzomys flavescens (Waterhouse, 1837) in GBIF Secretariat (2021). GBIF Backbone Taxonomy. Checklist dataset https://doi.org/10.15468/39omei accessed via GBIF.org. Accessed from R via rgbif (https://github.com/ropensci/rgbif) on 2021-04-29.			1928	NA
125	Oligoryzomys flavescens	-65.8692	-17.2119	RGBIF	Oligoryzomys flavescens (Waterhouse, 1837) in GBIF Secretariat (2021). GBIF Backbone Taxonomy. Checklist dataset https://doi.org/10.15468/39omei accessed via GBIF.org. Accessed from R via rgbif (https://github.com/ropensci/rgbif) on 2021-04-29.			1993	NA
126	Oligoryzomys flavescens	-65.8235	-27.8479	RGBIF	Oligoryzomys flavescens (Waterhouse, 1837) in GBIF Secretariat (2021). GBIF Backbone Taxonomy. Checklist dataset https://doi.org/10.15468/39omei accessed via GBIF.org. Accessed from R via rgbif (https://github.com/ropensci/rgbif) on 2021-04-29.			1990	NA
127	Oligoryzomys flavescens	-65.771	-26.7401	RGBIF	Oligoryzomys flavescens (Waterhouse, 1837) in GBIF Secretariat (2021). GBIF Backbone Taxonomy. Checklist dataset https://doi.org/10.15468/39omei accessed via GBIF.org. Accessed from R via rgbif (https://github.com/ropensci/rgbif) on 2021-04-29.			1983	NA
128	Oligoryzomys flavescens	-65.6972	-26.925	RGBIF	Oligoryzomys flavescens (Waterhouse, 1837) in GBIF Secretariat (2021). GBIF Backbone Taxonomy. Checklist dataset https://doi.org/10.15468/39omei accessed via GBIF.org. Accessed from R via rgbif (https://github.com/ropensci/rgbif) on 2021-04-29.			NA	NA
129	Oligoryzomys flavescens	-65.5883	-27.3519	RGBIF	Oligoryzomys flavescens (Waterhouse, 1837) in GBIF Secretariat (2021). GBIF Backbone Taxonomy. Checklist dataset https://doi.org/10.15468/39omei accessed via GBIF.org. Accessed from R via rgbif (https://github.com/ropensci/rgbif) on 2021-04-29.			NA	NA
130	Oligoryzomys flavescens	-65.5833	-27.3333	RGBIF	Oligoryzomys flavescens (Waterhouse, 1837) in GBIF Secretariat (2021). GBIF Backbone Taxonomy. Checklist dataset https://doi.org/10.15468/39omei accessed via GBIF.org. Accessed from R via rgbif (https://github.com/ropensci/rgbif) on 2021-04-29.			1927	NA
131	Oligoryzomys flavescens	-65.5333	-17.0333	RGBIF	Oligoryzomys flavescens (Waterhouse, 1837) in GBIF Secretariat (2021). GBIF Backbone Taxonomy. Checklist dataset https://doi.org/10.15468/39omei accessed via GBIF.org. Accessed from R via rgbif (https://github.com/ropensci/rgbif) on 2021-04-29.			1993	NA
132	Oligoryzomys flavescens	-65.5113	-26.3931	RGBIF	Oligoryzomys flavescens (Waterhouse, 1837) in GBIF Secretariat (2021). GBIF Backbone Taxonomy. Checklist dataset https://doi.org/10.15468/39omei accessed via GBIF.org. Accessed from R via rgbif (https://github.com/ropensci/rgbif) on 2021-04-29.			1990	NA
133	Oligoryzomys flavescens	-65.4656	-17.2272	RGBIF	Oligoryzomys flavescens (Waterhouse, 1837) in GBIF Secretariat (2021). GBIF Backbone Taxonomy. Checklist dataset https://doi.org/10.15468/39omei accessed via GBIF.org. Accessed from R via rgbif (https://github.com/ropensci/rgbif) on 2021-04-29.			1993	NA
134	Oligoryzomys flavescens	-65.3917	-26.822	RGBIF	Oligoryzomys flavescens (Waterhouse, 1837) in GBIF Secretariat (2021). GBIF Backbone Taxonomy. Checklist dataset https://doi.org/10.15468/39omei accessed via GBIF.org. Accessed from R via rgbif (https://github.com/ropensci/rgbif) on 2021-04-29.			NA	NA
135	Oligoryzomys flavescens	-65.3762	-24.4147	RGBIF	Oligoryzomys flavescens (Waterhouse, 1837) in GBIF Secretariat (2021). GBIF Backbone Taxonomy. Checklist dataset https://doi.org/10.15468/39omei accessed via GBIF.org. Accessed from R via rgbif (https://github.com/ropensci/rgbif) on 2021-04-29.			1998	NA
136	Oligoryzomys flavescens	-65.0422	-32.0576	RGBIF	Oligoryzomys flavescens (Waterhouse, 1837) in GBIF Secretariat (2021). GBIF Backbone Taxonomy. Checklist dataset https://doi.org/10.15468/39omei accessed via GBIF.org. Accessed from R via rgbif (https://github.com/ropensci/rgbif) on 2021-04-29.			NA	NA
137	Oligoryzomys flavescens	-64.9813	-26.2496	RGBIF	Oligoryzomys flavescens (Waterhouse, 1837) in GBIF Secretariat (2021). GBIF Backbone Taxonomy. Checklist dataset https://doi.org/10.15468/39omei accessed via GBIF.org. Accessed from R via rgbif (https://github.com/ropensci/rgbif) on 2021-04-29.			1998	NA
138	Oligoryzomys flavescens	-64.9167	-21.4833	RGBIF	Oligoryzomys flavescens (Waterhouse, 1837) in GBIF Secretariat (2021). GBIF Backbone Taxonomy. Checklist dataset https://doi.org/10.15468/39omei accessed via GBIF.org. Accessed from R via rgbif (https://github.com/ropensci/rgbif) on 2021-04-29.			1991	NA
139	Oligoryzomys flavescens	-64.9086	-26.4631	RGBIF	Oligoryzomys flavescens (Waterhouse, 1837) in GBIF Secretariat (2021). GBIF Backbone Taxonomy. Checklist dataset https://doi.org/10.15468/39omei accessed via GBIF.org. Accessed from R via rgbif (https://github.com/ropensci/rgbif) on 2021-04-29.			1990	NA
140	Oligoryzomys flavescens	-64.8167	-21.45	RGBIF	Oligoryzomys flavescens (Waterhouse, 1837) in GBIF Secretariat (2021). GBIF Backbone Taxonomy. Checklist dataset https://doi.org/10.15468/39omei accessed via GBIF.org. Accessed from R via rgbif (https://github.com/ropensci/rgbif) on 2021-04-29.			1991	NA
141	Oligoryzomys flavescens	-64.8034	-31.5743	RGBIF	Oligoryzomys flavescens (Waterhouse, 1837) in GBIF Secretariat (2021). GBIF Backbone Taxonomy. Checklist dataset https://doi.org/10.15468/39omei accessed via GBIF.org. Accessed from R via rgbif (https://github.com/ropensci/rgbif) on 2021-04-29.			1983	NA
142	Oligoryzomys flavescens	-64.5667	-19.0833	RGBIF	Oligoryzomys flavescens (Waterhouse, 1837) in GBIF Secretariat (2021). GBIF Backbone Taxonomy. Checklist dataset https://doi.org/10.15468/39omei accessed via GBIF.org. Accessed from R via rgbif (https://github.com/ropensci/rgbif) on 2021-04-29.			1990	NA
143	Oligoryzomys flavescens	-64.55	-21.2833	RGBIF	Oligoryzomys flavescens (Waterhouse, 1837) in GBIF Secretariat (2021). GBIF Backbone Taxonomy. Checklist dataset https://doi.org/10.15468/39omei accessed via GBIF.org. Accessed from R via rgbif (https://github.com/ropensci/rgbif) on 2021-04-29.			1991	NA
144	Oligoryzomys flavescens	-64.49	-19.4	RGBIF	Oligoryzomys flavescens (Waterhouse, 1837) in GBIF Secretariat (2021). GBIF Backbone Taxonomy. Checklist dataset https://doi.org/10.15468/39omei accessed via GBIF.org. Accessed from R via rgbif (https://github.com/ropensci/rgbif) on 2021-04-29.			1990	NA
145	Oligoryzomys flavescens	-64.4849	-24.2965	RGBIF	Oligoryzomys flavescens (Waterhouse, 1837) in GBIF Secretariat (2021). GBIF Backbone Taxonomy. Checklist dataset https://doi.org/10.15468/39omei accessed via GBIF.org. Accessed from R via rgbif (https://github.com/ropensci/rgbif) on 2021-04-29.			2006	NA
146	Oligoryzomys flavescens	-64.4833	-21.2667	RGBIF	Oligoryzomys flavescens (Waterhouse, 1837) in GBIF Secretariat (2021). GBIF Backbone Taxonomy. Checklist dataset https://doi.org/10.15468/39omei accessed via GBIF.org. Accessed from R via rgbif (https://github.com/ropensci/rgbif) on 2021-04-29.			1991	NA
147	Oligoryzomys flavescens	-64.4833	-19.0333	RGBIF	Oligoryzomys flavescens (Waterhouse, 1837) in GBIF Secretariat (2021). GBIF Backbone Taxonomy. Checklist dataset https://doi.org/10.15468/39omei accessed via GBIF.org. Accessed from R via rgbif (https://github.com/ropensci/rgbif) on 2021-04-29.			1990	NA
148	Oligoryzomys flavescens	-64.3585	-32.8505	RGBIF	Oligoryzomys flavescens (Waterhouse, 1837) in GBIF Secretariat (2021). GBIF Backbone Taxonomy. Checklist dataset https://doi.org/10.15468/39omei accessed via GBIF.org. Accessed from R via rgbif (https://github.com/ropensci/rgbif) on 2021-04-29.			1991	NA
149	Oligoryzomys flavescens	-64.3504	-33.0249	RGBIF	Oligoryzomys flavescens (Waterhouse, 1837) in GBIF Secretariat (2021). GBIF Backbone Taxonomy. Checklist dataset https://doi.org/10.15468/39omei accessed via GBIF.org. Accessed from R via rgbif (https://github.com/ropensci/rgbif) on 2021-04-29.			1995	NA
150	Oligoryzomys flavescens	-64.3222	-23.1358	RGBIF	Oligoryzomys flavescens (Waterhouse, 1837) in GBIF Secretariat (2021). GBIF Backbone Taxonomy. Checklist dataset https://doi.org/10.15468/39omei accessed via GBIF.org. Accessed from R via rgbif (https://github.com/ropensci/rgbif) on 2021-04-29.			NA	NA
151	Oligoryzomys flavescens	-64.3167	-21.45	RGBIF	Oligoryzomys flavescens (Waterhouse, 1837) in GBIF Secretariat (2021). GBIF Backbone Taxonomy. Checklist dataset https://doi.org/10.15468/39omei accessed via GBIF.org. Accessed from R via rgbif (https://github.com/ropensci/rgbif) on 2021-04-29.			1986	NA
152	Oligoryzomys flavescens	-64.2917	-21.3833	RGBIF	Oligoryzomys flavescens (Waterhouse, 1837) in GBIF Secretariat (2021). GBIF Backbone Taxonomy. Checklist dataset https://doi.org/10.15468/39omei accessed via GBIF.org. Accessed from R via rgbif (https://github.com/ropensci/rgbif) on 2021-04-29.			1997	NA
153	Oligoryzomys flavescens	-64.2667	-19.1167	RGBIF	Oligoryzomys flavescens (Waterhouse, 1837) in GBIF Secretariat (2021). GBIF Backbone Taxonomy. Checklist dataset https://doi.org/10.15468/39omei accessed via GBIF.org. Accessed from R via rgbif (https://github.com/ropensci/rgbif) on 2021-04-29.			1990	NA
154	Oligoryzomys flavescens	-64.2333	-23.2833	RGBIF	Oligoryzomys flavescens (Waterhouse, 1837) in GBIF Secretariat (2021). GBIF Backbone Taxonomy. Checklist dataset https://doi.org/10.15468/39omei accessed via GBIF.org. Accessed from R via rgbif (https://github.com/ropensci/rgbif) on 2021-04-29.			1947	NA
155	Oligoryzomys flavescens	-64.2167	-19.1833	RGBIF	Oligoryzomys flavescens (Waterhouse, 1837) in GBIF Secretariat (2021). GBIF Backbone Taxonomy. Checklist dataset https://doi.org/10.15468/39omei accessed via GBIF.org. Accessed from R via rgbif (https://github.com/ropensci/rgbif) on 2021-04-29.			1990	NA
156	Oligoryzomys flavescens	-64.2	-21.4667	RGBIF	Oligoryzomys flavescens (Waterhouse, 1837) in GBIF Secretariat (2021). GBIF Backbone Taxonomy. Checklist dataset https://doi.org/10.15468/39omei accessed via GBIF.org. Accessed from R via rgbif (https://github.com/ropensci/rgbif) on 2021-04-29.			1991	NA
157	Oligoryzomys flavescens	-64.2	-21.4833	RGBIF	Oligoryzomys flavescens (Waterhouse, 1837) in GBIF Secretariat (2021). GBIF Backbone Taxonomy. Checklist dataset https://doi.org/10.15468/39omei accessed via GBIF.org. Accessed from R via rgbif (https://github.com/ropensci/rgbif) on 2021-04-29.			1991	NA
158	Oligoryzomys flavescens	-64.1333	-19.55	RGBIF	Oligoryzomys flavescens (Waterhouse, 1837) in GBIF Secretariat (2021). GBIF Backbone Taxonomy. Checklist dataset https://doi.org/10.15468/39omei accessed via GBIF.org. Accessed from R via rgbif (https://github.com/ropensci/rgbif) on 2021-04-29.			1990	NA
159	Oligoryzomys flavescens	-64.1025	-21.653	RGBIF	Oligoryzomys flavescens (Waterhouse, 1837) in GBIF Secretariat (2021). GBIF Backbone Taxonomy. Checklist dataset https://doi.org/10.15468/39omei accessed via GBIF.org. Accessed from R via rgbif (https://github.com/ropensci/rgbif) on 2021-04-29.			1997	NA
160	Oligoryzomys flavescens	-64.0833	-18.2833	RGBIF	Oligoryzomys flavescens (Waterhouse, 1837) in GBIF Secretariat (2021). GBIF Backbone Taxonomy. Checklist dataset https://doi.org/10.15468/39omei accessed via GBIF.org. Accessed from R via rgbif (https://github.com/ropensci/rgbif) on 2021-04-29.			1991	NA
161	Oligoryzomys flavescens	-64.0833	-19.3333	RGBIF	Oligoryzomys flavescens (Waterhouse, 1837) in GBIF Secretariat (2021). GBIF Backbone Taxonomy. Checklist dataset https://doi.org/10.15468/39omei accessed via GBIF.org. Accessed from R via rgbif (https://github.com/ropensci/rgbif) on 2021-04-29.			1990	NA
162	Oligoryzomys flavescens	-64.05	-17.9167	RGBIF	Oligoryzomys flavescens (Waterhouse, 1837) in GBIF Secretariat (2021). GBIF Backbone Taxonomy. Checklist dataset https://doi.org/10.15468/39omei accessed via GBIF.org. Accessed from R via rgbif (https://github.com/ropensci/rgbif) on 2021-04-29.			1984	NA
163	Oligoryzomys flavescens	-63.9167	-21.4333	RGBIF	Oligoryzomys flavescens (Waterhouse, 1837) in GBIF Secretariat (2021). GBIF Backbone Taxonomy. Checklist dataset https://doi.org/10.15468/39omei accessed via GBIF.org. Accessed from R via rgbif (https://github.com/ropensci/rgbif) on 2021-04-29.			1991	NA
164	Oligoryzomys flavescens	-63.7379	-22.2431	RGBIF	Oligoryzomys flavescens (Waterhouse, 1837) in GBIF Secretariat (2021). GBIF Backbone Taxonomy. Checklist dataset https://doi.org/10.15468/39omei accessed via GBIF.org. Accessed from R via rgbif (https://github.com/ropensci/rgbif) on 2021-04-29.			NA	NA
165	Oligoryzomys flavescens	-63.7292	-22.1099	RGBIF	Oligoryzomys flavescens (Waterhouse, 1837) in GBIF Secretariat (2021). GBIF Backbone Taxonomy. Checklist dataset https://doi.org/10.15468/39omei accessed via GBIF.org. Accessed from R via rgbif (https://github.com/ropensci/rgbif) on 2021-04-29.			NA	NA
166	Oligoryzomys flavescens	-63.55	-21.2667	RGBIF	Oligoryzomys flavescens (Waterhouse, 1837) in GBIF Secretariat (2021). GBIF Backbone Taxonomy. Checklist dataset https://doi.org/10.15468/39omei accessed via GBIF.org. Accessed from R via rgbif (https://github.com/ropensci/rgbif) on 2021-04-29.			1991	NA
167	Oligoryzomys flavescens	-61.4756	-24.9278	RGBIF	Oligoryzomys flavescens (Waterhouse, 1837) in GBIF Secretariat (2021). GBIF Backbone Taxonomy. Checklist dataset https://doi.org/10.15468/39omei accessed via GBIF.org. Accessed from R via rgbif (https://github.com/ropensci/rgbif) on 2021-04-29.			1989	NA
168	Oligoryzomys flavescens	-66.3688	-28.8665	Miguel Lillo Colection				1964	NA
169	Oligoryzomys flavescens	-66.3058	-28.8333	Miguel Lillo Colection				NA	NA
170	Oligoryzomys flavescens	-65.9694	-27.175	Miguel Lillo Colection				NA	NA
171	Oligoryzomys flavescens	-65.9632	-27.3482	Miguel Lillo Colection				1992	NA
172	Oligoryzomys flavescens	-65.9301	-27.2149	Miguel Lillo Colection				NA	NA
173	Oligoryzomys flavescens	-65.8928	-27.2587	Miguel Lillo Colection				NA	NA
174	Oligoryzomys flavescens	-65.8729	-27.2851	Miguel Lillo Colection				NA	NA
175	Oligoryzomys flavescens	-65.797	-27.8301	Miguel Lillo Colection				1999	NA
176	Oligoryzomys flavescens	-65.7433	-27.9288	Miguel Lillo Colection				1990	NA
177	Oligoryzomys flavescens	-65.6736	-27.7422	Miguel Lillo Colection				1991	NA
178	Oligoryzomys flavescens	-65.6624	-27.0245	Miguel Lillo Colection				1994	NA
179	Oligoryzomys flavescens	-65.644	-24.9073	Miguel Lillo Colection				1969	NA
180	Oligoryzomys flavescens	-65.6123	-26.6885	Miguel Lillo Colection				NA	NA
181	Oligoryzomys flavescens	-65.5978	-26.3122	Miguel Lillo Colection				1998	NA
182	Oligoryzomys flavescens	-65.5603	-26.6564	Miguel Lillo Colection				NA	NA
183	Oligoryzomys flavescens	-65.4783	-24.627	Miguel Lillo Colection				1970	NA
184	Oligoryzomys flavescens	-65.4698	-26.7668	Miguel Lillo Colection				2004	NA
185	Oligoryzomys flavescens	-65.4692	-23.9353	Miguel Lillo Colection				1995	NA
186	Oligoryzomys flavescens	-65.4358	-26.1922	Miguel Lillo Colection				1957	NA
187	Oligoryzomys flavescens	-65.4042	-27.0542	Miguel Lillo Colection				NA	NA
188	Oligoryzomys flavescens	-65.4006	-24.0897	Miguel Lillo Colection				2002	NA
189	Oligoryzomys flavescens	-65.3649	-24.3902	Miguel Lillo Colection				1998	NA
190	Oligoryzomys flavescens	-65.3592	-26.7506	Miguel Lillo Colection				NA	NA
191	Oligoryzomys flavescens	-65.3096	-27.1946	Miguel Lillo Colection				1930	NA
192	Oligoryzomys flavescens	-65.3082	-23.9904	Miguel Lillo Colection				1998	NA
193	Oligoryzomys flavescens	-65.2926	-26.8162	Miguel Lillo Colection				1960	NA
194	Oligoryzomys flavescens	-65.2778	-27.5131	Miguel Lillo Colection				1960	NA
195	Oligoryzomys flavescens	-65.2612	-27.1372	Miguel Lillo Colection				1930	NA
196	Oligoryzomys flavescens	-65.1433	-24.075	Miguel Lillo Colection				2005	NA
197	Oligoryzomys flavescens	-65.1	-23.8267	Miguel Lillo Colection				2005	NA
198	Oligoryzomys flavescens	-64.9931	-24.5022	Miguel Lillo Colection				1995	NA
199	Oligoryzomys flavescens	-64.9839	-26.2756	Miguel Lillo Colection				1998	NA
200	Oligoryzomys flavescens	-64.898	-23.1189	Miguel Lillo Colection				NA	NA
201	Oligoryzomys flavescens	-64.8369	-23.0724	Miguel Lillo Colection				NA	NA
202	Oligoryzomys flavescens	-64.7424	-26.5002	Miguel Lillo Colection				1987	NA
203	Oligoryzomys flavescens	-64.7423	-23.0943	Miguel Lillo Colection				NA	NA
204	Oligoryzomys flavescens	-64.5992	-22.5118	Miguel Lillo Colection				1993	NA
205	Oligoryzomys flavescens	-64.4254	-22.6643	Miguel Lillo Colection				2005	NA
206	Calomys fecundus	-65.0667	-26.7565	Calderon et al.	Brote de Síndrome Pulmonar por Hantavirus, Tucumán, Argentina	2018	Medicina (Bs. As.)	April 2016	Sherman
207	Calomys fecundus	-65.0338	-26.7368	Calderon et al.	Brote de Síndrome Pulmonar por Hantavirus, Tucumán, Argentina	2018	Medicina (Bs. As.)	April 2016	Sherman
208	Calomys boliviae	-64.9167	-23.9667	Carrizo and Díaz	Descripción morfológica del esqueñeto axial de filotinos (Rodentia: Sigmodontinae): Aspectos morfofuncionales y filogenéticos	2013	Mastozoología Neotropical	NA	NA
209	Calomys fecundus	-64.6033	-23.6447	Jayat et al.	Mamíferos del Pedemonte de Yungas de la Alta Cuenca del Río Bermejo en Argentina una Línea de Base de Diversidad	2010	Mastozoología Neotropical	May 2003 to March 2008	Sherman
210	Calomys fecundus	-64.5814	-23.6628	Jayat et al.	Mamíferos del Pedemonte de Yungas de la Alta Cuenca del Río Bermejo en Argentina una Línea de Base de Diversidad	2010	Mastozoología Neotropical	May 2003 to March 2008	Sherman
211	Calomys fecundus	-64.5706	-24.1697	Jayat et al.	Mamíferos del Pedemonte de Yungas de la Alta Cuenca del Río Bermejo en Argentina una Línea de Base de Diversidad	2010	Mastozoología Neotropical	May 2003 to March 2008	Sherman
212	Calomys fecundus	-64.5342	-23.6619	Jayat et al.	Mamíferos del Pedemonte de Yungas de la Alta Cuenca del Río Bermejo en Argentina una Línea de Base de Diversidad	2010	Mastozoología Neotropical	May 2003 to March 2008	Sherman
213	Calomys fecundus	-64.5261	-23.8275	Jayat et al.	Mamíferos del Pedemonte de Yungas de la Alta Cuenca del Río Bermejo en Argentina una Línea de Base de Diversidad	2010	Mastozoología Neotropical	May 2003 to March 2008	Sherman
214	Calomys fecundus	-64.2778	-23.1181	Jayat et al.	Mamíferos del Pedemonte de Yungas de la Alta Cuenca del Río Bermejo en Argentina una Línea de Base de Diversidad	2010	Mastozoología Neotropical	May 2003 to March 2008	Sherman
215	Calomys fecundus	-64.2689	-23.0864	Jayat et al.	Mamíferos del Pedemonte de Yungas de la Alta Cuenca del Río Bermejo en Argentina una Línea de Base de Diversidad	2010	Mastozoología Neotropical	May 2003 to March 2008	Sherman
216	Calomys fecundus	-64.0794	-22.8517	Jayat et al.	Mamíferos del Pedemonte de Yungas de la Alta Cuenca del Río Bermejo en Argentina una Línea de Base de Diversidad	2010	Mastozoología Neotropical	May 2003 to March 2008	Sherman
217	Calomys fecundus	-63.9267	-22.0286	Jayat et al.	Mamíferos del Pedemonte de Yungas de la Alta Cuenca del Río Bermejo en Argentina una Línea de Base de Diversidad	2010	Mastozoología Neotropical	May 2003 to March 2008	Sherman
218	Calomys fecundus	-63.8303	-22.3303	Jayat et al.	Mamíferos del Pedemonte de Yungas de la Alta Cuenca del Río Bermejo en Argentina una Línea de Base de Diversidad	2010	Mastozoología Neotropical	May 2003 to March 2008	Sherman
219	Calomys fecundus	-65.6833	-28.1667	Pinotti et al.	Multiple refugia and glacial expansions in the Tucumane–Bolivian Yungas: The phylogeography and potential distribution modeling of Calomys fecundus (Thomas, 1926) (Rodentia: Cricetidae)	2020	Journal of Zoological Systematics and Evolutionary Research	NA	Live catch traps
220	Calomys fecundus	-65.6685	-27.1917	Pinotti et al.	Multiple refugia and glacial expansions in the Tucumane–Bolivian Yungas: The phylogeography and potential distribution modeling of Calomys fecundus (Thomas, 1926) (Rodentia: Cricetidae)	2020	Journal of Zoological Systematics and Evolutionary Research	NA	Live catch traps
221	Calomys fecundus	-65.659	-28.1128	Pinotti et al.	Multiple refugia and glacial expansions in the Tucumane–Bolivian Yungas: The phylogeography and potential distribution modeling of Calomys fecundus (Thomas, 1926) (Rodentia: Cricetidae)	2020	Journal of Zoological Systematics and Evolutionary Research	NA	Live catch traps
222	Calomys fecundus	-65.65	24.9167	Pinotti et al.	Multiple refugia and glacial expansions in the Tucumane–Bolivian Yungas: The phylogeography and potential distribution modeling of Calomys fecundus (Thomas, 1926) (Rodentia: Cricetidae)	2020	Journal of Zoological Systematics and Evolutionary Research	NA	Live catch traps
223	Calomys fecundus	-65.6191	-25.094	Pinotti et al.	Multiple refugia and glacial expansions in the Tucumane–Bolivian Yungas: The phylogeography and potential distribution modeling of Calomys fecundus (Thomas, 1926) (Rodentia: Cricetidae)	2020	Journal of Zoological Systematics and Evolutionary Research	NA	Live catch traps
224	Calomys fecundus	-65.5833	-27.3333	Pinotti et al.	Multiple refugia and glacial expansions in the Tucumane–Bolivian Yungas: The phylogeography and potential distribution modeling of Calomys fecundus (Thomas, 1926) (Rodentia: Cricetidae)	2020	Journal of Zoological Systematics and Evolutionary Research	NA	Live catch traps
225	Calomys fecundus	-65.5791	-27.3273	Pinotti et al.	Multiple refugia and glacial expansions in the Tucumane–Bolivian Yungas: The phylogeography and potential distribution modeling of Calomys fecundus (Thomas, 1926) (Rodentia: Cricetidae)	2020	Journal of Zoological Systematics and Evolutionary Research	NA	Live catch traps
226	Calomys fecundus	-65.5113	-26.3932	Pinotti et al.	Multiple refugia and glacial expansions in the Tucumane–Bolivian Yungas: The phylogeography and potential distribution modeling of Calomys fecundus (Thomas, 1926) (Rodentia: Cricetidae)	2020	Journal of Zoological Systematics and Evolutionary Research	NA	Live catch traps
227	Calomys fecundus	-65.483	-26.076	Pinotti et al.	Multiple refugia and glacial expansions in the Tucumane–Bolivian Yungas: The phylogeography and potential distribution modeling of Calomys fecundus (Thomas, 1926) (Rodentia: Cricetidae)	2020	Journal of Zoological Systematics and Evolutionary Research	NA	Live catch traps
228	Calomys fecundus	-65.4707	-26.7693	Pinotti et al.	Multiple refugia and glacial expansions in the Tucumane–Bolivian Yungas: The phylogeography and potential distribution modeling of Calomys fecundus (Thomas, 1926) (Rodentia: Cricetidae)	2020	Journal of Zoological Systematics and Evolutionary Research	NA	Live catch traps
229	Calomys fecundus	-65.3833	-26.8	Pinotti et al.	Multiple refugia and glacial expansions in the Tucumane–Bolivian Yungas: The phylogeography and potential distribution modeling of Calomys fecundus (Thomas, 1926) (Rodentia: Cricetidae)	2020	Journal of Zoological Systematics and Evolutionary Research	NA	Live catch traps
230	Calomys fecundus	-65.3762	-24.4147	Pinotti et al.	Multiple refugia and glacial expansions in the Tucumane–Bolivian Yungas: The phylogeography and potential distribution modeling of Calomys fecundus (Thomas, 1926) (Rodentia: Cricetidae)	2020	Journal of Zoological Systematics and Evolutionary Research	NA	Live catch traps
231	Calomys fecundus	-65.3761	-27.0272	Pinotti et al.	Multiple refugia and glacial expansions in the Tucumane–Bolivian Yungas: The phylogeography and potential distribution modeling of Calomys fecundus (Thomas, 1926) (Rodentia: Cricetidae)	2020	Journal of Zoological Systematics and Evolutionary Research	NA	Live catch traps
232	Calomys fecundus	-65.3686	-27.0152	Pinotti et al.	Multiple refugia and glacial expansions in the Tucumane–Bolivian Yungas: The phylogeography and potential distribution modeling of Calomys fecundus (Thomas, 1926) (Rodentia: Cricetidae)	2020	Journal of Zoological Systematics and Evolutionary Research	NA	Live catch traps
233	Calomys fecundus	-65.3221	-26.8805	Pinotti et al.	Multiple refugia and glacial expansions in the Tucumane–Bolivian Yungas: The phylogeography and potential distribution modeling of Calomys fecundus (Thomas, 1926) (Rodentia: Cricetidae)	2020	Journal of Zoological Systematics and Evolutionary Research	NA	Live catch traps
234	Calomys fecundus	-65.3167	-26.9	Pinotti et al.	Multiple refugia and glacial expansions in the Tucumane–Bolivian Yungas: The phylogeography and potential distribution modeling of Calomys fecundus (Thomas, 1926) (Rodentia: Cricetidae)	2020	Journal of Zoological Systematics and Evolutionary Research	NA	Live catch traps
235	Calomys fecundus	-65.2991	-26.9173	Pinotti et al.	Multiple refugia and glacial expansions in the Tucumane–Bolivian Yungas: The phylogeography and potential distribution modeling of Calomys fecundus (Thomas, 1926) (Rodentia: Cricetidae)	2020	Journal of Zoological Systematics and Evolutionary Research	NA	Live catch traps
236	Calomys fecundus	-65.2966	24.1264	Pinotti et al.	Multiple refugia and glacial expansions in the Tucumane–Bolivian Yungas: The phylogeography and potential distribution modeling of Calomys fecundus (Thomas, 1926) (Rodentia: Cricetidae)	2020	Journal of Zoological Systematics and Evolutionary Research	NA	Live catch traps
237	Calomys fecundus	-65.2794	-24.302	Pinotti et al.	Multiple refugia and glacial expansions in the Tucumane–Bolivian Yungas: The phylogeography and potential distribution modeling of Calomys fecundus (Thomas, 1926) (Rodentia: Cricetidae)	2020	Journal of Zoological Systematics and Evolutionary Research	NA	Live catch traps
238	Calomys fecundus	-65.2593	-26.7331	Pinotti et al.	Multiple refugia and glacial expansions in the Tucumane–Bolivian Yungas: The phylogeography and potential distribution modeling of Calomys fecundus (Thomas, 1926) (Rodentia: Cricetidae)	2020	Journal of Zoological Systematics and Evolutionary Research	NA	Live catch traps
239	Calomys fecundus	-65.0974	-26.7556	Pinotti et al.	Multiple refugia and glacial expansions in the Tucumane–Bolivian Yungas: The phylogeography and potential distribution modeling of Calomys fecundus (Thomas, 1926) (Rodentia: Cricetidae)	2020	Journal of Zoological Systematics and Evolutionary Research	NA	Live catch traps
240	Calomys fecundus	-65.0477	-26.7215	Pinotti et al.	Multiple refugia and glacial expansions in the Tucumane–Bolivian Yungas: The phylogeography and potential distribution modeling of Calomys fecundus (Thomas, 1926) (Rodentia: Cricetidae)	2020	Journal of Zoological Systematics and Evolutionary Research	NA	Live catch traps
241	Calomys fecundus	-65.0267	-26.4453	Pinotti et al.	Multiple refugia and glacial expansions in the Tucumane–Bolivian Yungas: The phylogeography and potential distribution modeling of Calomys fecundus (Thomas, 1926) (Rodentia: Cricetidae)	2020	Journal of Zoological Systematics and Evolutionary Research	NA	Live catch traps
242	Calomys fecundus	-65.022	-26.6584	Pinotti et al.	Multiple refugia and glacial expansions in the Tucumane–Bolivian Yungas: The phylogeography and potential distribution modeling of Calomys fecundus (Thomas, 1926) (Rodentia: Cricetidae)	2020	Journal of Zoological Systematics and Evolutionary Research	NA	Live catch traps
243	Calomys fecundus	-64.9813	-26.2496	Pinotti et al.	Multiple refugia and glacial expansions in the Tucumane–Bolivian Yungas: The phylogeography and potential distribution modeling of Calomys fecundus (Thomas, 1926) (Rodentia: Cricetidae)	2020	Journal of Zoological Systematics and Evolutionary Research	NA	Live catch traps
244	Calomys fecundus	-64.9479	-25.5487	Pinotti et al.	Multiple refugia and glacial expansions in the Tucumane–Bolivian Yungas: The phylogeography and potential distribution modeling of Calomys fecundus (Thomas, 1926) (Rodentia: Cricetidae)	2020	Journal of Zoological Systematics and Evolutionary Research	NA	Live catch traps
245	Calomys fecundus	-64.9432	-24.3252	Pinotti et al.	Multiple refugia and glacial expansions in the Tucumane–Bolivian Yungas: The phylogeography and potential distribution modeling of Calomys fecundus (Thomas, 1926) (Rodentia: Cricetidae)	2020	Journal of Zoological Systematics and Evolutionary Research	NA	Live catch traps
246	Calomys fecundus	-64.9292	-25.5446	Pinotti et al.	Multiple refugia and glacial expansions in the Tucumane–Bolivian Yungas: The phylogeography and potential distribution modeling of Calomys fecundus (Thomas, 1926) (Rodentia: Cricetidae)	2020	Journal of Zoological Systematics and Evolutionary Research	NA	Live catch traps
247	Calomys fecundus	-64.9167	-21.4833	Pinotti et al.	Multiple refugia and glacial expansions in the Tucumane–Bolivian Yungas: The phylogeography and potential distribution modeling of Calomys fecundus (Thomas, 1926) (Rodentia: Cricetidae)	2020	Journal of Zoological Systematics and Evolutionary Research	NA	Live catch traps
248	Calomys fecundus	-64.9086	-26.4631	Pinotti et al.	Multiple refugia and glacial expansions in the Tucumane–Bolivian Yungas: The phylogeography and potential distribution modeling of Calomys fecundus (Thomas, 1926) (Rodentia: Cricetidae)	2020	Journal of Zoological Systematics and Evolutionary Research	NA	Live catch traps
249	Calomys fecundus	-64.8498	-23.7609	Pinotti et al.	Multiple refugia and glacial expansions in the Tucumane–Bolivian Yungas: The phylogeography and potential distribution modeling of Calomys fecundus (Thomas, 1926) (Rodentia: Cricetidae)	2020	Journal of Zoological Systematics and Evolutionary Research	NA	Live catch traps
250	Calomys fecundus	-64.8488	-23.0333	Pinotti et al.	Multiple refugia and glacial expansions in the Tucumane–Bolivian Yungas: The phylogeography and potential distribution modeling of Calomys fecundus (Thomas, 1926) (Rodentia: Cricetidae)	2020	Journal of Zoological Systematics and Evolutionary Research	NA	Live catch traps
251	Calomys fecundus	-64.8294	-28.1372	Pinotti et al.	Multiple refugia and glacial expansions in the Tucumane–Bolivian Yungas: The phylogeography and potential distribution modeling of Calomys fecundus (Thomas, 1926) (Rodentia: Cricetidae)	2020	Journal of Zoological Systematics and Evolutionary Research	NA	Live catch traps
252	Calomys fecundus	-64.8167	-21.45	Pinotti et al.	Multiple refugia and glacial expansions in the Tucumane–Bolivian Yungas: The phylogeography and potential distribution modeling of Calomys fecundus (Thomas, 1926) (Rodentia: Cricetidae)	2020	Journal of Zoological Systematics and Evolutionary Research	NA	Live catch traps
253	Calomys fecundus	-64.7903	-23.8259	Pinotti et al.	Multiple refugia and glacial expansions in the Tucumane–Bolivian Yungas: The phylogeography and potential distribution modeling of Calomys fecundus (Thomas, 1926) (Rodentia: Cricetidae)	2020	Journal of Zoological Systematics and Evolutionary Research	NA	Live catch traps
254	Calomys fecundus	-64.7833	-23.7833	Pinotti et al.	Multiple refugia and glacial expansions in the Tucumane–Bolivian Yungas: The phylogeography and potential distribution modeling of Calomys fecundus (Thomas, 1926) (Rodentia: Cricetidae)	2020	Journal of Zoological Systematics and Evolutionary Research	NA	Live catch traps
255	Calomys fecundus	-64.7608	-23.7939	Pinotti et al.	Multiple refugia and glacial expansions in the Tucumane–Bolivian Yungas: The phylogeography and potential distribution modeling of Calomys fecundus (Thomas, 1926) (Rodentia: Cricetidae)	2020	Journal of Zoological Systematics and Evolutionary Research	NA	Live catch traps
256	Calomys fecundus	-64.75	-26.5	Pinotti et al.	Multiple refugia and glacial expansions in the Tucumane–Bolivian Yungas: The phylogeography and potential distribution modeling of Calomys fecundus (Thomas, 1926) (Rodentia: Cricetidae)	2020	Journal of Zoological Systematics and Evolutionary Research	NA	Live catch traps
257	Calomys fecundus	-64.6667	-21.7833	Pinotti et al.	Multiple refugia and glacial expansions in the Tucumane–Bolivian Yungas: The phylogeography and potential distribution modeling of Calomys fecundus (Thomas, 1926) (Rodentia: Cricetidae)	2020	Journal of Zoological Systematics and Evolutionary Research	NA	Live catch traps
258	Calomys fecundus	-64.5949	-22.7154	Pinotti et al.	Multiple refugia and glacial expansions in the Tucumane–Bolivian Yungas: The phylogeography and potential distribution modeling of Calomys fecundus (Thomas, 1926) (Rodentia: Cricetidae)	2020	Journal of Zoological Systematics and Evolutionary Research	NA	Live catch traps
259	Calomys fecundus	-64.5947	-25.0149	Pinotti et al.	Multiple refugia and glacial expansions in the Tucumane–Bolivian Yungas: The phylogeography and potential distribution modeling of Calomys fecundus (Thomas, 1926) (Rodentia: Cricetidae)	2020	Journal of Zoological Systematics and Evolutionary Research	NA	Live catch traps
260	Calomys fecundus	-64.5833	-23.1	Pinotti et al.	Multiple refugia and glacial expansions in the Tucumane–Bolivian Yungas: The phylogeography and potential distribution modeling of Calomys fecundus (Thomas, 1926) (Rodentia: Cricetidae)	2020	Journal of Zoological Systematics and Evolutionary Research	NA	Live catch traps
261	Calomys fecundus	-64.5678	-24.0878	Pinotti et al.	Multiple refugia and glacial expansions in the Tucumane–Bolivian Yungas: The phylogeography and potential distribution modeling of Calomys fecundus (Thomas, 1926) (Rodentia: Cricetidae)	2020	Journal of Zoological Systematics and Evolutionary Research	NA	Live catch traps
262	Calomys fecundus	-64.5667	-24.0667	Pinotti et al.	Multiple refugia and glacial expansions in the Tucumane–Bolivian Yungas: The phylogeography and potential distribution modeling of Calomys fecundus (Thomas, 1926) (Rodentia: Cricetidae)	2020	Journal of Zoological Systematics and Evolutionary Research	NA	Live catch traps
263	Calomys fecundus	-64.5553	-22.9528	Pinotti et al.	Multiple refugia and glacial expansions in the Tucumane–Bolivian Yungas: The phylogeography and potential distribution modeling of Calomys fecundus (Thomas, 1926) (Rodentia: Cricetidae)	2020	Journal of Zoological Systematics and Evolutionary Research	NA	Live catch traps
264	Calomys fecundus	-64.5414	-23.6439	Pinotti et al.	Multiple refugia and glacial expansions in the Tucumane–Bolivian Yungas: The phylogeography and potential distribution modeling of Calomys fecundus (Thomas, 1926) (Rodentia: Cricetidae)	2020	Journal of Zoological Systematics and Evolutionary Research	NA	Live catch traps
265	Calomys fecundus	-64.5297	-22.4392	Pinotti et al.	Multiple refugia and glacial expansions in the Tucumane–Bolivian Yungas: The phylogeography and potential distribution modeling of Calomys fecundus (Thomas, 1926) (Rodentia: Cricetidae)	2020	Journal of Zoological Systematics and Evolutionary Research	NA	Live catch traps
266	Calomys fecundus	-64.509	-23.5613	Pinotti et al.	Multiple refugia and glacial expansions in the Tucumane–Bolivian Yungas: The phylogeography and potential distribution modeling of Calomys fecundus (Thomas, 1926) (Rodentia: Cricetidae)	2020	Journal of Zoological Systematics and Evolutionary Research	NA	Live catch traps
267	Calomys fecundus	-64.4975	-23.5656	Pinotti et al.	Multiple refugia and glacial expansions in the Tucumane–Bolivian Yungas: The phylogeography and potential distribution modeling of Calomys fecundus (Thomas, 1926) (Rodentia: Cricetidae)	2020	Journal of Zoological Systematics and Evolutionary Research	NA	Live catch traps
268	Calomys fecundus	-64.4961	-22.8696	Pinotti et al.	Multiple refugia and glacial expansions in the Tucumane–Bolivian Yungas: The phylogeography and potential distribution modeling of Calomys fecundus (Thomas, 1926) (Rodentia: Cricetidae)	2020	Journal of Zoological Systematics and Evolutionary Research	NA	Live catch traps
269	Calomys fecundus	-64.4849	-24.2965	Pinotti et al.	Multiple refugia and glacial expansions in the Tucumane–Bolivian Yungas: The phylogeography and potential distribution modeling of Calomys fecundus (Thomas, 1926) (Rodentia: Cricetidae)	2020	Journal of Zoological Systematics and Evolutionary Research	NA	Live catch traps
270	Calomys fecundus	-64.4833	-21.2667	Pinotti et al.	Multiple refugia and glacial expansions in the Tucumane–Bolivian Yungas: The phylogeography and potential distribution modeling of Calomys fecundus (Thomas, 1926) (Rodentia: Cricetidae)	2020	Journal of Zoological Systematics and Evolutionary Research	NA	Live catch traps
271	Calomys fecundus	-64.45	-22.8833	Pinotti et al.	Multiple refugia and glacial expansions in the Tucumane–Bolivian Yungas: The phylogeography and potential distribution modeling of Calomys fecundus (Thomas, 1926) (Rodentia: Cricetidae)	2020	Journal of Zoological Systematics and Evolutionary Research	NA	Live catch traps
272	Calomys fecundus	-64.4063	-23.6704	Pinotti et al.	Multiple refugia and glacial expansions in the Tucumane–Bolivian Yungas: The phylogeography and potential distribution modeling of Calomys fecundus (Thomas, 1926) (Rodentia: Cricetidae)	2020	Journal of Zoological Systematics and Evolutionary Research	NA	Live catch traps
273	Calomys fecundus	-64.3625	-23.558	Pinotti et al.	Multiple refugia and glacial expansions in the Tucumane–Bolivian Yungas: The phylogeography and potential distribution modeling of Calomys fecundus (Thomas, 1926) (Rodentia: Cricetidae)	2020	Journal of Zoological Systematics and Evolutionary Research	NA	Live catch traps
274	Calomys fecundus	-64.3333	-23.1333	Pinotti et al.	Multiple refugia and glacial expansions in the Tucumane–Bolivian Yungas: The phylogeography and potential distribution modeling of Calomys fecundus (Thomas, 1926) (Rodentia: Cricetidae)	2020	Journal of Zoological Systematics and Evolutionary Research	NA	Live catch traps
275	Calomys fecundus	-64.3	-19.2	Pinotti et al.	Multiple refugia and glacial expansions in the Tucumane–Bolivian Yungas: The phylogeography and potential distribution modeling of Calomys fecundus (Thomas, 1926) (Rodentia: Cricetidae)	2020	Journal of Zoological Systematics and Evolutionary Research	NA	Live catch traps
276	Calomys fecundus	-64.287	-23.1166	Pinotti et al.	Multiple refugia and glacial expansions in the Tucumane–Bolivian Yungas: The phylogeography and potential distribution modeling of Calomys fecundus (Thomas, 1926) (Rodentia: Cricetidae)	2020	Journal of Zoological Systematics and Evolutionary Research	NA	Live catch traps
277	Calomys fecundus	-64.25	-23.2667	Pinotti et al.	Multiple refugia and glacial expansions in the Tucumane–Bolivian Yungas: The phylogeography and potential distribution modeling of Calomys fecundus (Thomas, 1926) (Rodentia: Cricetidae)	2020	Journal of Zoological Systematics and Evolutionary Research	NA	Live catch traps
278	Calomys fecundus	-64.2494	-28.0271	Pinotti et al.	Multiple refugia and glacial expansions in the Tucumane–Bolivian Yungas: The phylogeography and potential distribution modeling of Calomys fecundus (Thomas, 1926) (Rodentia: Cricetidae)	2020	Journal of Zoological Systematics and Evolutionary Research	NA	Live catch traps
279	Calomys fecundus	-64.2322	-28.0304	Pinotti et al.	Multiple refugia and glacial expansions in the Tucumane–Bolivian Yungas: The phylogeography and potential distribution modeling of Calomys fecundus (Thomas, 1926) (Rodentia: Cricetidae)	2020	Journal of Zoological Systematics and Evolutionary Research	NA	Live catch traps
280	Calomys fecundus	-64.0833	-19.3333	Pinotti et al.	Multiple refugia and glacial expansions in the Tucumane–Bolivian Yungas: The phylogeography and potential distribution modeling of Calomys fecundus (Thomas, 1926) (Rodentia: Cricetidae)	2020	Journal of Zoological Systematics and Evolutionary Research	NA	Live catch traps
281	Calomys fecundus	-63.9167	-21.4333	Pinotti et al.	Multiple refugia and glacial expansions in the Tucumane–Bolivian Yungas: The phylogeography and potential distribution modeling of Calomys fecundus (Thomas, 1926) (Rodentia: Cricetidae)	2020	Journal of Zoological Systematics and Evolutionary Research	NA	Live catch traps
282	Calomys fecundus	-63.8096	-22.6124	Pinotti et al.	Multiple refugia and glacial expansions in the Tucumane–Bolivian Yungas: The phylogeography and potential distribution modeling of Calomys fecundus (Thomas, 1926) (Rodentia: Cricetidae)	2020	Journal of Zoological Systematics and Evolutionary Research	NA	Live catch traps
283	Calomys fecundus	-63.7833	-21.8	Pinotti et al.	Multiple refugia and glacial expansions in the Tucumane–Bolivian Yungas: The phylogeography and potential distribution modeling of Calomys fecundus (Thomas, 1926) (Rodentia: Cricetidae)	2020	Journal of Zoological Systematics and Evolutionary Research	NA	Live catch traps
284	Calomys fecundus	-63.7333	-22.2667	Pinotti et al.	Multiple refugia and glacial expansions in the Tucumane–Bolivian Yungas: The phylogeography and potential distribution modeling of Calomys fecundus (Thomas, 1926) (Rodentia: Cricetidae)	2020	Journal of Zoological Systematics and Evolutionary Research	NA	Live catch traps
285	Calomys fecundus	-63.6	-19.5167	Pinotti et al.	Multiple refugia and glacial expansions in the Tucumane–Bolivian Yungas: The phylogeography and potential distribution modeling of Calomys fecundus (Thomas, 1926) (Rodentia: Cricetidae)	2020	Journal of Zoological Systematics and Evolutionary Research	NA	Live catch traps
286	Calomys fecundus	-63.5833	-19.4833	Pinotti et al.	Multiple refugia and glacial expansions in the Tucumane–Bolivian Yungas: The phylogeography and potential distribution modeling of Calomys fecundus (Thomas, 1926) (Rodentia: Cricetidae)	2020	Journal of Zoological Systematics and Evolutionary Research	NA	Live catch traps
287	Calomys fecundus	-63.5167	-19.8	Pinotti et al.	Multiple refugia and glacial expansions in the Tucumane–Bolivian Yungas: The phylogeography and potential distribution modeling of Calomys fecundus (Thomas, 1926) (Rodentia: Cricetidae)	2020	Journal of Zoological Systematics and Evolutionary Research	NA	Live catch traps
288	Calomys fecundus	-63.5167	-19.4333	Pinotti et al.	Multiple refugia and glacial expansions in the Tucumane–Bolivian Yungas: The phylogeography and potential distribution modeling of Calomys fecundus (Thomas, 1926) (Rodentia: Cricetidae)	2020	Journal of Zoological Systematics and Evolutionary Research	NA	Live catch traps
289	Calomys fecundus	-63.5	-21.25	Pinotti et al.	Multiple refugia and glacial expansions in the Tucumane–Bolivian Yungas: The phylogeography and potential distribution modeling of Calomys fecundus (Thomas, 1926) (Rodentia: Cricetidae)	2020	Journal of Zoological Systematics and Evolutionary Research	NA	Live catch traps
290	Calomys fecundus	-63.3833	-21.0833	Pinotti et al.	Multiple refugia and glacial expansions in the Tucumane–Bolivian Yungas: The phylogeography and potential distribution modeling of Calomys fecundus (Thomas, 1926) (Rodentia: Cricetidae)	2020	Journal of Zoological Systematics and Evolutionary Research	NA	Live catch traps
291	Calomys fecundus	-63.3667	-19.3167	Pinotti et al.	Multiple refugia and glacial expansions in the Tucumane–Bolivian Yungas: The phylogeography and potential distribution modeling of Calomys fecundus (Thomas, 1926) (Rodentia: Cricetidae)	2020	Journal of Zoological Systematics and Evolutionary Research	NA	Live catch traps
292	Calomys fecundus	-63.1667	-20.85	Pinotti et al.	Multiple refugia and glacial expansions in the Tucumane–Bolivian Yungas: The phylogeography and potential distribution modeling of Calomys fecundus (Thomas, 1926) (Rodentia: Cricetidae)	2020	Journal of Zoological Systematics and Evolutionary Research	NA	Live catch traps
293	Calomys fecundus	-63.0333	-20.4333	Pinotti et al.	Multiple refugia and glacial expansions in the Tucumane–Bolivian Yungas: The phylogeography and potential distribution modeling of Calomys fecundus (Thomas, 1926) (Rodentia: Cricetidae)	2020	Journal of Zoological Systematics and Evolutionary Research	NA	Live catch traps
294	Calomys fecundus	-63.0167	-20.2667	Pinotti et al.	Multiple refugia and glacial expansions in the Tucumane–Bolivian Yungas: The phylogeography and potential distribution modeling of Calomys fecundus (Thomas, 1926) (Rodentia: Cricetidae)	2020	Journal of Zoological Systematics and Evolutionary Research	NA	Live catch traps
295	Calomys fecundus	-62.85	-20.9667	Pinotti et al.	Multiple refugia and glacial expansions in the Tucumane–Bolivian Yungas: The phylogeography and potential distribution modeling of Calomys fecundus (Thomas, 1926) (Rodentia: Cricetidae)	2020	Journal of Zoological Systematics and Evolutionary Research	NA	Live catch traps
296	Calomys fecundus	-62.8333	-20.45	Pinotti et al.	Multiple refugia and glacial expansions in the Tucumane–Bolivian Yungas: The phylogeography and potential distribution modeling of Calomys fecundus (Thomas, 1926) (Rodentia: Cricetidae)	2020	Journal of Zoological Systematics and Evolutionary Research	NA	Live catch traps
297	Calomys fecundus	-65.3164	-26.7929	Salazar-Bravo et al.	Phylogeny and Evolution of the Neotropical Rodent Genus Calomys: Inferences from Mitochondrial DNA Sequence Data	2001	Molecular Phylogenetics and Evolution	NA	NA
298	Calomys fecundus	-64.8336	-21.4572	Salazar-Bravo et al.	Phylogeny and Evolution of the Neotropical Rodent Genus Calomys: Inferences from Mitochondrial DNA Sequence Data	2001	Molecular Phylogenetics and Evolution	NA	NA
299	Calomys fecundus	-63.9698	-19.8179	Salazar-Bravo et al.	Phylogeny and Evolution of the Neotropical Rodent Genus Calomys: Inferences from Mitochondrial DNA Sequence Data	2001	Molecular Phylogenetics and Evolution	NA	NA
300	Calomys fecundus	-65.3667	-26.8167	Salazar-Bravo et al.	Natural nidality in Bolivian hemorrhagic fever and the systematics of the reservoir species	2002	Infection, Genetics and Evolution	NA	NA
301	Calomys fecundus	-63.85	-19.7167	Salazar-Bravo et al.	Natural nidality in Bolivian hemorrhagic fever and the systematics of the reservoir species	2002	Infection, Genetics and Evolution	NA	NA
302	Calomys fecundus	-63.7833	-21.45	Salazar-Bravo et al.	Natural nidality in Bolivian hemorrhagic fever and the systematics of the reservoir species	2002	Infection, Genetics and Evolution	NA	NA
303	Calomys fecundus	-63.3833	-21	Salazar-Bravo et al.	Natural nidality in Bolivian hemorrhagic fever and the systematics of the reservoir species	2002	Infection, Genetics and Evolution	NA	NA
304	Calomys fecundus	-63.2167	-20.75	Salazar-Bravo et al.	Natural nidality in Bolivian hemorrhagic fever and the systematics of the reservoir species	2002	Infection, Genetics and Evolution	NA	NA
305	Calomys boliviae	-64.5697	-23.8186	RGBIF	Calomys boliviae (Thomas, 1901) in GBIF Secretariat (2021). GBIF Backbone Taxonomy. Checklist dataset https://doi.org/10.15468/39omei accessed via GBIF.org. Accessed from R via rgbif (https://github.com/ropensci/rgbif) on 2021-06-01.			1984	NA
306	Calomys fecundus	-65.7238	-26.8146	Miguel Lillo Colection				1987	NA
307	Calomys fecundus	-65.7111	-26.852	Miguel Lillo Colection				1975	NA
308	Calomys fecundus	-65.6736	-27.7422	Miguel Lillo Colection				1991	NA
309	Calomys fecundus	-65.6175	-26.3006	Miguel Lillo Colection				1957	NA
310	Calomys fecundus	-65.5988	-28.1014	Miguel Lillo Colection				2005	NA
311	Calomys fecundus	-65.5882	-27.3465	Miguel Lillo Colection				1927	NA
312	Calomys fecundus	-65.5669	-26.1951	Miguel Lillo Colection				1956	NA
313	Calomys fecundus	-65.536	-26.1864	Miguel Lillo Colection				1996	NA
314	Calomys fecundus	-65.4943	-26.4523	Miguel Lillo Colection				1958	NA
315	Calomys fecundus	-65.4942	-26.2362	Miguel Lillo Colection				1955	NA
316	Calomys fecundus	-65.4668	-26.524	Miguel Lillo Colection				NA	NA
317	Calomys fecundus	-65.4578	-24.9002	Miguel Lillo Colection				1989	NA
318	Calomys fecundus	-65.4358	-26.1922	Miguel Lillo Colection				NA	NA
319	Calomys fecundus	-65.429	-26.6716	Miguel Lillo Colection				1959	NA
320	Calomys fecundus	-65.4162	-24.7885	Miguel Lillo Colection				1969	NA
321	Calomys fecundus	-65.3811	-26.8493	Miguel Lillo Colection				1991	NA
322	Calomys fecundus	-65.3649	-24.3902	Miguel Lillo Colection				1998	NA
323	Calomys fecundus	-65.3469	-26.4811	Miguel Lillo Colection				NA	NA
324	Calomys fecundus	-65.3304	-26.7928	Miguel Lillo Colection				1990	NA
325	Calomys fecundus	-65.3287	-26.7746	Miguel Lillo Colection				1982	NA
326	Calomys fecundus	-65.3178	-26.8705	Miguel Lillo Colection				NA	NA
327	Calomys fecundus	-65.3151	-26.4743	Miguel Lillo Colection				2009	NA
328	Calomys fecundus	-65.3096	-27.1946	Miguel Lillo Colection				1930	NA
329	Calomys fecundus	-65.306	-24.4952	Miguel Lillo Colection				1998	NA
330	Calomys fecundus	-65.2993	-26.6913	Miguel Lillo Colection				NA	NA
331	Calomys fecundus	-65.2926	-26.8162	Miguel Lillo Colection				1960	NA
332	Calomys fecundus	-65.2778	-27.5131	Miguel Lillo Colection				1960	NA
333	Calomys fecundus	-65.2778	-26.2651	Miguel Lillo Colection				1964	NA
334	Calomys fecundus	-65.2679	-26.5977	Miguel Lillo Colection				2009	NA
335	Calomys fecundus	-65.21	-26.6284	Miguel Lillo Colection				1995	NA
336	Calomys fecundus	-65.1894	-26.6385	Miguel Lillo Colection				1982	NA
337	Calomys fecundus	-65.174	-26.8369	Miguel Lillo Colection				NA	NA
338	Calomys fecundus	-65.1553	-26.7495	Miguel Lillo Colection				NA	NA
339	Calomys fecundus	-65.1116	-24.0334	Miguel Lillo Colection				2001	NA
340	Calomys fecundus	-65.0437	-26.6021	Miguel Lillo Colection				1971	NA
341	Calomys fecundus	-65.0309	-25.4696	Miguel Lillo Colection				2003	NA
342	Calomys fecundus	-65.0291	-24.7925	Miguel Lillo Colection				1983	NA
343	Calomys fecundus	-64.9875	-25.3981	Miguel Lillo Colection				2006	NA
344	Calomys fecundus	-64.9839	-26.2756	Miguel Lillo Colection				1998	NA
345	Calomys fecundus	-64.9688	-24.3139	Miguel Lillo Colection				NA	NA
346	Calomys fecundus	-64.965	-28.284	Miguel Lillo Colection				1964	NA
347	Calomys fecundus	-64.9479	-26.6872	Miguel Lillo Colection				1934	NA
348	Calomys fecundus	-64.9069	-26.4592	Miguel Lillo Colection				1995	NA
349	Calomys fecundus	-64.8939	-24.5449	Miguel Lillo Colection				1995	NA
350	Calomys fecundus	-64.8809	-26.496	Miguel Lillo Colection				2000	NA
351	Calomys fecundus	-64.8617	-25.8983	Miguel Lillo Colection				2006	NA
352	Calomys fecundus	-64.8492	-23.7588	Miguel Lillo Colection				1979	NA
353	Calomys fecundus	-64.7916	-23.8067	Miguel Lillo Colection				NA	NA
354	Calomys fecundus	-64.6918	-26.2516	Miguel Lillo Colection				1997	NA
355	Calomys fecundus	-64.6444	-24.7223	Miguel Lillo Colection				1982	NA
356	Calomys fecundus	-64.5912	-23.6468	Miguel Lillo Colection				1991	NA
357	Calomys fecundus	-64.5765	-22.6848	Miguel Lillo Colection				1972	NA
358	Calomys fecundus	-64.5541	-24.1024	Miguel Lillo Colection				2006	NA
359	Calomys fecundus	-64.5527	-23.0027	Miguel Lillo Colection				2004	NA
360	Calomys fecundus	-64.5404	-23.1062	Miguel Lillo Colection				NA	NA
361	Calomys fecundus	-64.5263	-22.4416	Miguel Lillo Colection				1992	NA
362	Calomys fecundus	-64.5233	-23.5547	Miguel Lillo Colection				2000	NA
363	Calomys fecundus	-64.5068	-22.6797	Miguel Lillo Colection				1970	NA
364	Calomys fecundus	-64.4988	-22.8969	Miguel Lillo Colection				1963	NA
365	Calomys fecundus	-64.4768	-24.8645	Miguel Lillo Colection				2006	NA
366	Calomys fecundus	-64.4701	-23.6434	Miguel Lillo Colection				1964	NA
367	Calomys fecundus	-64.4446	-23.8562	Miguel Lillo Colection				1995	NA
368	Calomys fecundus	-64.4256	-23.039	Miguel Lillo Colection				1990	NA
369	Calomys fecundus	-64.4254	-22.6643	Miguel Lillo Colection				1973	NA
370	Calomys fecundus	-64.3866	-22.7446	Miguel Lillo Colection				1971	NA
371	Calomys fecundus	-64.2476	-23.2555	Miguel Lillo Colection				1968	NA
372	Calomys fecundus	-64.2199	-23.2979	Miguel Lillo Colection				1947	NA
373	Calomys fecundus	-64.1999	-24.675	Miguel Lillo Colection				1955	NA
374	Calomys fecundus	-64.1847	-24.787	Miguel Lillo Colection				1988	NA
375	Calomys fecundus	-63.8688	-22.3522	Miguel Lillo Colection				1979	NA
376	Calomys fecundus	-63.8104	-22.5963	Miguel Lillo Colection				1989	NA
377	Calomys fecundus	-63.7701	-22.2353	Miguel Lillo Colection				1936	NA
378	Calomys fecundus	-63.7386	-22.2401	Miguel Lillo Colection				1930	NA
379	Calomys fecundus	-63.6583	-22.1996	Miguel Lillo Colection				1936	NA
	NA = Not Available
